# Supplementary material for: A Comparative Study of TabNet and Classical Machine Learning Models for Landslide Prediction
Source: Research Square preprint supplement (doi:10.21203/rs.3.rs-7694229/v1), 2025-10-18
Supplement: Supplementary file 1 [file ebaf198a23b0b43116558a18.xlsx]

## Sheet: Sheet1
Slope (°)	Elevation (m)	Rainfall (mm/year)	Distance to Fault (m)	Distance to River (m)	Aspect (°)	Soil Type	Land Cover	Lithology
35.37	379.2	1848.3	1002.2	1703.3	334.4	5	4	3
30.29	315.6	1654.7	1342.3	372.7	178.8	4	3	2
36.58	852.8	2123	2438.5	920.6	303.5	3	2	1
43.58	923.5	2569.4	335.2	342.9	160.5	3	2	5
29.53	241.9	1163.9	844.1	595.9	255.1	5	2	1
29.53	1155.6	2033.8	2903	501.8	263.5	5	3	1
44.03	262.5	1913.5	625.4	1415.1	62.6	2	2	5
37.54	756.7	2276.9	1298.7	722.7	130	4	4	2
27.64	926.2	2076.7	3094.4	1342.6	229.4	2	4	4
35.74	1089.7	1654.8	652.9	1146.1	25.5	2	2	2
27.69	931.2	1844	404.6	1865.5	130.2	4	3	2
27.67	1019.7	1635.6	1786.8	264.2	192.5	3	1	2
33.34	552.8	2453.8	1160.3	1423.4	358.6	5	2	2
16.09	1033	1992.8	2058.1	1375.7	170.8	1	2	3
17.6	290.9	2814.5	2885.1	478.4	293.8	3	2	4
26.9	1113.8	1957	591.8	1316.7	155.5	5	4	3
23.3	763.1	1673.9	2117.6	1032.7	286.7	5	1	5
33.91	1035.5	1321.9	1859	794.1	214.3	2	2	1
24.14	666.8	1195.3	615.6	541.6	319.2	3	3	3
20.1	860	1291.1	2266.6	586	147.9	3	3	3
43.13	741.7	2100.3	1061.3	1758.1	217.5	2	2	5
29.59	948.9	2205.9	1798.2	890.7	226.8	5	4	1
31.94	292.4	1292.4	403	1221.5	150.3	5	3	3
20	271	2374.7	1701	555.6	52	2	2	5
27.04	459.6	1772.4	1174.2	560.3	33.7	1	1	2
32.29	371.1	2047.7	2949	1348.4	6	1	2	5
22.19	1090.5	2688.2	316	319.1	314.5	5	4	1
34.41	431.4	2375.5	1560	714.6	85.1	2	3	4
26.59	1195.6	1866.1	1697	904.8	76.1	3	4	5
29.07	550.3	1594	2614	937.5	265	3	2	4
26.59	393.9	1042.9	2095.5	814.6	115.2	3	1	3
46.22	1007.6	1669.2	2415.2	1058	182.2	1	1	1
31.29	875.3	1891.2	2793	1183.7	58.5	2	2	5
22.94	713.2	1552	3086	1201.4	345.5	5	3	3
37.98	770.9	1926.1	1199.7	473.1	306.6	5	3	1
21.63	936.4	2017.1	1970.8	770.1	311	4	2	4
33.07	440.7	1885.2	3010	1396.1	146.4	1	2	3
15.72	1216.3	1699.4	3523.7	1269.1	274.5	2	2	1
20.77	1194.5	2057.2	3179.9	309.3	51.8	3	2	2
32.97	866.8	2176.7	1397.8	1039.2	3.1	2	2	1
37.31	411.5	1506.9	791.4	53	7.2	5	1	3
32.77	897	2600.2	1803.5	910.3	211.2	3	1	4
30.47	282.9	1940.4	2671.2	1693.7	163.9	1	1	3
28.99	241	1991.7	1814.4	489.2	186.5	5	1	5
19.57	470.3	2293.1	1782.1	537.2	2.7	5	1	5
25.64	677.2	2085.4	3003.5	1213.8	152.2	1	3	4
27.71	1087	2400.1	1363.2	237.3	258.5	3	2	1
39.86	944.4	2109	3077.7	622.6	159.4	2	4	4
34.15	960.1	1715.8	1519.4	1142.9	263.6	3	1	3
17.3	639.7	2141.5	1249.1	621.9	83.9	2	2	3
33.99	559.4	1483.6	1681.7	790.5	292.7	3	2	4
28.32	584.7	2031	2742.8	1205.4	211.8	5	1	2
25.98	1207.5	1969	553.4	1068.8	75.9	3	4	5
36.29	250.5	1892.5	795.7	1003.3	85.2	1	1	1
39.65	1085.7	1927.3	3393	746.8	226.1	3	4	4
38.85	794.5	1160.9	723.7	1047	298.8	2	4	1
24.69	653	1743.7	2073	838	149.6	5	3	5
28.93	942.5	2024.1	2112.8	1084.2	93	3	3	1
34.05	701.5	2053.4	1804.3	680	312.1	2	3	1
39.2	1092.2	1534.3	2337.9	813.1	240.9	2	2	2
27.57	1119.7	2536.7	910.6	471.4	161.3	4	3	2
29.91	635.9	1604.9	2021.2	875.6	175.6	2	1	2
22.55	489.6	2407.2	1400.3	547.1	73.5	4	1	3
21.83	808.3	2170.2	2396.1	418.8	225.6	2	2	3
37.9	1131.5	1701	605.8	999.9	129.1	2	3	1
42.25	422.8	2759.5	2083.8	980.5	358.4	3	4	2
30.82	839.2	1461.8	757.3	1221.8	172.9	5	1	5
39.43	847.9	2385.3	1078.5	707.9	174.9	5	4	4
34.29	950.4	2420.9	872.4	1063.1	203.7	2	2	4
26.24	342.9	1690.4	749	1123.6	330	3	2	4
34.29	933	2592.1	2960.4	1078.7	288.3	1	2	2
43.7	1128.1	1874.2	1102.8	540.9	162.4	3	2	1
31.11	391.5	2109.7	3309.3	953.6	258.7	3	1	2
43.92	449.9	2097.3	3456.5	1044.5	211	5	3	5
10.44	1191.1	1924.8	2085.1	893.4	177.3	5	4	5
37.98	392.8	2337.9	611.9	7.2	69.2	3	2	3
32.1	1072.9	2330.3	1408.4	958.3	167	3	2	1
29.01	707.2	1219.2	2864.2	1827	88.5	5	4	1
32.13	459.7	2553.6	1383.8	738	329.3	4	3	2
15.5	1089.5	1256.8	419.3	582.2	120.7	1	2	3
29.64	659.8	2434.8	2035.3	1048.4	342.8	2	2	1
34.26	730	2476	3027.2	1022.6	191.9	3	4	5
43.22	572.8	1506.6	2858	1395.3	227.4	2	3	2
27.25	808.9	1803.9	722.4	357.9	195.5	2	2	5
24.93	375.2	1500.2	2434.3	1200	46.6	1	2	4
27.39	605	1889.6	878.5	1140.3	135.3	3	4	4
38.72	1189.1	1848.9	870.6	830.2	35.7	2	1	4
34.03	470.7	2324.3	3126.8	1033.8	224.3	1	4	4
27.16	873.3	2556.2	978.9	1326.2	160.9	2	1	4
35.51	538.4	2593.6	1025.6	1259.7	280.1	4	3	4
32.18	991.2	1737.8	122.2	406.6	79.4	5	2	3
39.15	342.2	1892	3115.1	1237.6	59.2	3	2	5
25.78	1189.5	1247.7	2846.5	863	146.3	3	4	4
28.78	668.3	1631.3	2278	921.2	333.6	5	2	4
28.26	448.4	2405.2	2700.9	921.4	255.8	2	3	5
19.69	284.2	2689.7	643	826.8	150.8	2	1	2
33.77	381.5	1444	1696.6	1394.8	186.2	2	1	1
33.49	735	1724.5	1328.2	855	30.3	2	2	3
31.44	550.4	1972	442.6	416.5	354.4	3	3	3
29.52	1047.2	2106	1792.3	723.8	239.9	5	1	5
20.08	645.2	1629.6	3287.3	966	102.7	3	1	3
28.03	461.2	2168.9	257.8	1410.7	210.9	3	2	3
28.66	833.3	1776.4	1122.6	1145.7	39.4	5	3	3
24.98	923.8	1977.2	833.9	530.4	347.7	1	3	1
30.11	378.7	2222.3	939.2	1942.4	62.9	2	1	4
34.63	379.3	1986.3	3245	1002.5	233.3	3	1	5
46.49	247	1792.8	1730.2	1430.3	88.4	3	4	1
32.8	953.8	1935.6	1724.1	826.2	258.3	1	2	3
33.46	880.4	1944.9	2736.4	1116.2	279.7	3	4	3
30.8	689.4	1821.8	651.5	1245.7	242.4	3	4	1
16.05	1062.6	1870.4	1796.2	1406.1	221.2	4	3	1
31.19	1023.7	2682.3	1599.1	1338	321.3	3	1	5
31.88	801.2	2228.7	2173.4	1259.6	28.3	2	4	2
51.11	1087	1854.3	3558.5	757	119.1	1	3	2
29.86	417.9	2288.1	2766.9	648.4	89.4	3	3	1
33.81	323	1837.6	1488.7	1031.2	355.7	1	2	4
31.12	482.4	2496.3	2966.8	1285.4	140.2	5	2	4
22.05	267.7	2145.1	707.2	796.1	263.7	3	1	4
40.54	746.5	1936.6	224.8	1341.3	246.5	2	3	1
37.42	1156	2179.2	823.3	1505.3	76.3	4	3	5
37.73	249.7	1296.9	1291	502.5	86	3	2	2
24.12	333.3	1491	1876.4	536.1	101.3	2	2	2
42.62	666.7	1461.6	2236	831	148	4	2	3
20.19	1153.2	2046	3252.5	1020.6	84.4	5	3	2
36.09	529.3	2740.8	1873.9	668.4	7.1	4	4	5
48.92	722.3	2958.8	1844.4	1462.8	316.6	1	1	5
23.48	252	2262.4	292.8	1069.9	347.6	3	2	2
26.87	359.8	2202.4	240.1	907.1	123	4	1	5
32.2	1206.5	1196.3	2016	282.6	121.9	1	3	4
27.37	1184.8	1746.3	1627.3	333.4	2.6	2	3	5
18.99	215	1639.2	3006.8	1009.4	244.9	5	4	2
31.95	1171.3	1712.1	672.7	-12.3	297.2	1	2	3
22.9	855.5	1910	205.9	1319	52.8	4	4	2
35.19	1086.6	1777.1	1664.7	823.5	57.5	3	1	5
24.04	669.3	1118.3	936.9	2263.2	284.4	3	3	1
43.8	730.8	2310.4	290.7	1867.3	221.9	1	1	3
25.13	703.7	1514.6	2612.6	813.6	16.1	4	4	2
28.82	883.5	2088.1	503.9	845.4	224.1	3	3	2
37.91	351	2890.1	2212.6	1311.8	111.2	3	3	4
21.55	240.3	1581.6	1086.8	1611.4	132.7	4	4	5
33.22	521	877.5	716.8	197	277.1	4	1	4
41.86	921.7	1858.5	1426.3	134.2	291.9	5	1	5
18.54	413.9	2464.7	2877	627.1	144.1	3	4	2
32.88	890.2	2839.5	1468.8	1137.1	341	3	2	3
33.48	1189.6	1446.1	2702.6	1100.7	146.3	5	1	3
37.65	304.8	2200.6	551.7	1343.2	277.9	3	2	1
21.5	889.3	1780.1	2778.3	382.6	174.2	2	3	3
20.84	658.2	1937.2	935.1	-90	323.1	1	1	4
35.58	1086.8	3139.3	2450.2	1253.6	326.8	4	2	3
33.78	388.9	1326.6	2066.3	539.8	31.5	3	1	4
33.4	909.6	2094.4	3316.3	36	337.1	4	2	3
34.17	1056.5	2187.9	1452.4	951.8	297.2	3	4	1
25.96	1164.1	2458.1	347.6	1226.2	284.9	2	4	1
33.26	900.1	2026.3	185.9	838.7	72.3	3	3	3
33.74	712.1	2118.1	2964.4	696.6	289.8	1	1	2
25.69	834	1812.3	1925.1	822.9	306	3	4	1
46.33	1087.6	2101.1	2786.8	733.5	104.1	3	3	3
35.19	786.3	1833.5	926.4	319.8	342.8	3	1	3
21.87	240.7	2255.2	1307.1	587.9	17.9	4	4	2
36.65	1150.3	1821.9	223.6	1111.1	54	4	3	4
23.6	906.4	2148.3	3427.5	1026.6	193.5	4	3	4
37.7	893.3	1970.7	2417.5	961.5	207.3	1	3	2
40.67	427.8	2475.7	3330.2	469.2	232.3	2	2	4
24.83	875.5	1961	1033.3	813.6	6.1	3	2	4
39.11	607.8	1208.5	2223.4	-31.2	345.7	5	3	4
34.7	867.7	2535.1	2454	965.9	16.1	4	2	3
37.98	317.7	1587.6	1212.4	1495.2	51.5	4	2	1
46.57	874.4	1697.7	3037.5	266.4	5	2	3	4
29.44	1219.4	1723.1	3378.2	642.4	204.1	3	3	2
25.37	258.7	2584.3	3163.9	1029.7	335.6	3	2	5
24.28	1196.9	1050	2662.4	1420.7	239.7	2	3	5
24.87	621	3355	1074.5	700.7	296.2	1	4	3
30.78	1089.5	2445.1	1088.8	597.4	4.8	5	3	2
34.13	1000.2	2081.1	3434	57	195.1	2	2	2
33.61	782.7	1959.5	155.4	934.2	165.4	2	2	2
38.02	955.8	2108.3	2583.2	1754.8	179.6	1	2	3
31.5	1097.3	2211.3	2549.5	1007.8	26	5	1	2
43.03	618.2	2265.5	2262.1	881	246.4	3	2	3
29.28	540.3	2226.4	3526	1026.7	181.2	4	2	1
53.16	884.3	2022.7	1192.9	885.7	275.5	5	2	5
36.41	1025.9	1897.2	1289.5	546.3	174.7	2	4	1
24.54	979.9	1917.4	391.6	1238.9	53.8	3	1	5
22.83	1015.8	1898.3	1643.2	986	233.4	1	3	5
35.26	649.9	2479.1	1018	897.9	62.1	2	3	3
29.61	1036	2242.9	1301.3	477.5	314.1	4	1	4
37.11	331.4	698.3	2990.9	1442.2	220.7	4	4	3
35.19	759.9	2270.2	3338.1	1171.8	56.6	3	3	4
30.82	215.8	2068.6	758.9	656.3	346.4	3	2	2
24.63	537.8	1975.3	1401.4	1314.5	186.6	3	3	2
19.28	580.1	1813.7	3314.5	679.8	26.2	1	2	3
27.83	610.1	2474.8	332.6	559.4	225.7	2	3	3
38.25	912.4	2397.7	437.7	568.8	91.2	2	1	3
33.11	602.4	1645.7	680	140.7	289.3	2	4	2
21.43	663.2	2161.4	2167.5	1090	294.4	4	2	2
32.79	449.9	1558.8	637.6	115.3	352.4	2	3	1
34.48	587	1380.5	3450.2	370.4	180.7	2	2	1
24.33	439.5	1709.6	1656.7	11.8	163.8	3	3	2
32.63	283.9	2360.5	1845.2	854	271.3	5	3	1
31.87	819.5	2400.1	968.5	826.8	47.7	2	2	1
22.26	884.9	2207.8	1740.1	752.1	196.9	1	3	5
34.26	835.7	2300.4	2397	449.1	196.6	3	2	1
35.89	678.1	2209.1	2704	394.2	32.2	4	4	4
40.06	593.6	1703.1	2713.3	1087	150.5	3	2	2
39.83	1082	2172.3	2107.9	657.4	307.2	4	4	5
20.38	734.3	2333.4	3231	1024.3	308.2	5	4	3
23.9	694	2313.2	2931.9	515.7	35.7	4	2	2
35.52	235.9	2503.2	2724.2	967	32.7	3	2	3
35.51	554.7	2293.1	311.3	1442.1	94.6	3	2	2
35.52	594	2137.1	143.7	1138.5	314.9	1	4	3
53.8	612.8	2451.3	850.8	715.8	46.4	5	2	1
35.97	796	1971.9	2402.5	999.3	259.2	3	3	5
40.48	748.9	1598	1534.5	788.5	36.4	2	4	3
39.03	824	1912.2	1504.3	893.7	224.3	4	2	2
36.61	982.5	1657.9	3163	752.6	128.2	2	3	4
28.88	1031.1	1688.4	3200.7	820.8	284	3	2	2
37.47	935.3	1920.3	3247.6	980.2	84.1	3	1	5
25.22	1175.1	1637.1	1199.7	469.9	230.1	3	3	3
29.51	228.4	1848.9	2497.2	460.4	84.8	4	1	4
27.52	407.7	1155.8	1054.4	302.6	256.9	2	2	1
32.05	217.6	2076.7	775.7	213	314.5	3	4	5
49.92	863.9	1984	755.1	375.1	45.6	3	2	4
16.46	1117	1626.4	1296.9	957.9	312	4	4	2
36.89	455.9	2271.7	1599.1	512.5	213.7	4	4	1
18.5	1146.3	2393.3	2978.5	1107.8	45.8	3	2	2
27.62	270.9	1280.8	532.4	905.1	153.9	3	1	5
40.11	1153.8	1650.1	2648.1	57.1	57.9	2	3	2
31.91	565.1	1647.3	1948.2	1167.7	252.1	5	2	3
22.78	312.4	1572.7	1110.5	1233.6	273.2	3	1	1
25.68	700.7	2346.1	1815.3	469.7	38.1	4	3	2
36.84	469.3	1898.8	1151.8	1068.3	182.2	1	1	3
25.56	497.7	1867.9	2170.5	527.8	293.3	2	4	5
33.13	520.4	1107.6	1612.4	931.7	337	3	1	3
31.76	1021.1	2261.2	685.6	355.1	184.9	5	1	5
26.19	754.6	1441.8	521	131.4	342.1	3	1	3
48.55	524.4	2009.7	2000.6	728.4	192.8	5	4	1
36.47	826.4	2104.7	3224.3	838	141.9	3	3	2
15.2	933.3	2578.2	1303.2	722.1	305.4	3	4	3
32.89	485.4	1411.4	2641.5	389.2	177.5	1	2	5
26.11	627.7	663.7	2385.8	721.1	169.9	4	2	5
38.22	333.1	2063.9	3324.5	1004.4	176.5	2	2	2
25.06	393	2770.5	2944.2	871.4	304.8	5	2	2
30.48	897.9	2525	2069.1	967.7	299.5	5	3	2
35.44	393.3	2075.1	2380.2	606.7	145.3	5	3	5
38.33	740.4	1768.6	3210.4	1386.4	120	3	2	5
21.8	926.1	2336.3	1494.3	392.5	177.1	4	4	4
28.72	317.9	1558	1244.2	1096.8	206.2	4	1	2
27.6	783	2191.7	157.2	1390.7	85.8	1	4	3
26.17	469.1	2204.4	2963.3	1094	285.8	3	1	3
45.52	1182.6	2446.9	2875.4	804.7	175.1	1	2	2
34.64	698.4	3189.7	479.3	666.8	120.3	3	2	3
21.31	1024.1	2155	2104.4	1329	38.5	2	2	1
38.74	765.7	1761	1716.1	288.1	86	2	3	1
48.38	253.8	1972.3	528.4	479.7	341.7	3	2	5
39.66	849.5	1210.2	3493.2	722.1	109.8	3	2	4
19.25	1170.9	1679.8	858.6	1414.3	60.8	3	3	3
27.53	817.6	1804.6	351.3	1051.2	165.8	1	3	3
41.54	1037.4	1754.4	2166.3	480.6	110.6	3	4	2
25.74	1103	2050.1	2661.7	759	12.7	2	2	4
34.95	440.4	1624	231.6	630.4	116.3	3	3	4
37.6	424.2	2473.5	2386	589.9	195.9	3	3	4
23.98	827.1	1983.6	1951.1	1304.8	198.6	3	2	4
30.92	625.1	1979.4	475.2	309.7	128.4	4	2	2
5.47	1058.3	1840.2	713.5	1571.4	161	2	2	2
23.2	1119	2051.3	2073.8	1241	347.6	4	1	3
29.38	567	2344.2	1139.5	1352.2	135.8	3	2	2
21.42	449.2	1604.5	3347.8	694.4	93	3	1	4
44.46	998.3	1695.8	2936.5	826.9	87.6	3	3	2
19.96	487.6	1850.7	3503.5	283.7	164.8	1	3	1
27.88	1040.8	1395.2	1013.3	668.3	273.4	4	4	2
32.45	638	1625.4	3455.8	1099.4	74.2	3	3	5
42.93	884.2	1775.3	1603.4	1439	255.3	2	1	2
19.91	306.5	2365.7	1315.5	421.7	7.6	1	4	4
40.71	840.1	2098.3	293.2	735.7	150.8	1	4	3
31.48	666.3	2068.1	301.5	826.4	279.3	5	2	1
23.55	802.5	2355.4	2500.5	299.6	121.9	4	3	3
35.1	379.7	1923.5	1695.3	1140.7	202.9	1	4	4
32.99	954.2	2154.2	899.2	583.9	73.8	3	3	3
26.6	1081.4	1938.4	2232.1	807.7	267.1	3	4	5
31.96	428.9	2099.5	989.8	699.1	18.8	4	1	2
28.32	306.7	1728.8	2107.1	556.3	306.9	1	1	1
32.31	233.9	917.5	1355.7	887.4	71.4	2	2	5
36.7	858.4	1924.8	2953	799.1	314.8	5	3	2
44.09	823.2	2605.4	2943.2	733	126.9	1	4	3
21.5	762.2	2388.3	1762.1	582	260.2	2	4	4
48.46	444.3	2405.5	1326.8	1025.7	114.9	5	2	2
15.78	604.8	2523.8	1367.2	1590.4	326.1	3	1	4
30.19	810.4	2022.3	2891.7	949.6	45.6	2	4	1
36.11	711.7	2069.7	1248.9	1312.1	64.3	1	3	2
33.65	1207.7	1713.5	839.2	301.9	177.5	1	1	1
26.42	347.8	1845.3	411.3	957.2	29.5	2	2	5
29.74	912.1	2252.7	1725.4	425.9	70.6	5	3	2
27.46	618.4	2509.7	1778.5	265.2	339.8	3	3	4
26.69	642.5	1922.5	3012.7	577.4	351.5	4	2	5
38.2	934.8	1786.7	881.1	1394.9	135.5	5	2	3
34.26	909.4	1983.7	1430.6	1292.5	332.4	3	4	3
25.86	1211.2	2246.3	2900.9	993.3	196.1	2	3	3
38.6	339.7	1352.4	2953.3	241.6	97.1	3	2	2
33.86	315.2	979.8	1443.1	807.3	252.9	5	2	3
37.9	941.6	1742.9	1699.4	1018.1	237.2	4	3	4
36.44	794.2	1449.9	1163.3	964.7	356.1	1	2	5
24.77	486.9	1761.4	3328	109.9	95.4	4	1	5
26.92	290.2	1918.9	528.1	513.5	241.9	3	3	5
37.38	296.5	1785.4	3332.1	863.3	18.7	5	2	5
36.28	1113.1	2618.4	2472.5	1117.4	40.9	1	3	3
31.23	403.8	2126.3	1948.6	-39.2	1.4	3	1	4
32.34	536.6	2114.8	232.3	821.8	359.8	5	3	5
41.62	438.9	2255.5	1756.1	951	288.8	3	2	2
26.67	568.5	1485.7	1522.7	1250	283.2	3	1	5
35.78	280.1	2437.7	674.6	1183.7	183.5	1	1	3
29.78	734.3	1950.4	2378	1137	108	2	4	4
29.66	278.3	2276.6	3460.8	551.8	54.5	2	4	4
40.19	1018.4	1515	2053.9	82.7	102.5	5	2	5
38	446	1304.4	2578.8	724	135.3	2	3	2
37.91	755.4	2341	355.5	1314.4	272.3	3	3	4
41.84	1098.9	2148	1556.8	1480.2	194.3	4	4	3
31.57	867.4	1589.2	520.3	1191.2	27.9	2	2	2
36.86	748.3	1603.4	2228	1072.1	6.5	3	3	4
28.92	537.6	2475.4	3348.4	1051.1	36.8	4	1	3
33.99	546.3	1463.6	2396.5	655	147.8	5	2	4
30.36	886.2	2701.5	384.2	835.3	335.9	3	4	2
32.18	1214.1	1589.8	1340.1	1596.9	229.5	4	3	3
36.16	878.5	2262.5	2014.3	491.4	288.7	1	2	4
24.85	773.4	1839.9	1507	1573.9	167.9	5	1	3
48.14	948	2247.2	2987.7	754.1	130.2	1	3	1
23.35	679.9	1745.7	2922.5	1451.5	39	4	3	5
21.69	270.7	1912.3	2224.7	294.9	315.3	2	2	3
40.66	777.9	2001.4	1404.7	1138.4	281.9	5	4	4
37.73	1177.2	1545.4	998.4	578.5	60.5	4	1	3
36.39	387.1	2307.3	484.2	291.3	184.4	4	2	2
36.43	906.9	1759.2	1340.8	982.9	175.5	2	4	3
31.3	412.9	1883.6	1541.3	1317.7	225	3	2	3
24.22	751.2	1548.9	2444.8	532.7	340.6	3	2	3
32.01	307.6	863.5	2384.1	255.9	208.7	4	3	3
25.98	664.9	1900	361.2	851.5	194.5	1	4	3
39.2	973.7	3038.1	1479.7	853.4	18.1	5	1	1
30.22	561	2326.5	745.3	1122.5	22.6	5	4	3
24.8	881.6	1975.1	659.4	1292.4	67.4	2	3	1
28.83	1013.4	1868.6	2965.9	865.2	11.7	4	1	1
34.7	1146.4	1993.3	264.2	1675.8	267.6	3	3	5
26.89	447	2222.6	1562	985.3	260.4	3	2	4
24.82	613.3	1467.4	698.6	743.8	49	2	2	4
33.35	363.9	2470.6	3144.9	208.2	301	3	3	3
33.36	1212.4	2296.2	2036.2	779.2	55.7	4	4	5
27.34	1146.3	2297.4	915.9	748	108.4	3	1	4
27.63	755.4	2175.2	1848.3	1296.9	89.6	3	2	4
33.26	1060.5	1992.1	2636.3	1086.2	134	4	2	2
19.82	736.2	2277.6	3415.9	391.2	91.7	4	2	5
20.14	839.8	2242.2	878.3	963.3	176	1	2	5
25.65	300	1828.7	3168.5	1174.7	146.7	5	1	5
29.69	972.8	1732.8	3334	1537.2	355.2	3	3	1
33.89	339	2028	3272.5	1266.1	20.1	2	2	2
43.2	1044.3	2660.6	2305.8	1212.5	51.2	2	1	2
38.26	999.8	1441.9	2286.6	915.8	19	3	4	2
30.12	925.8	1342	1507	1054.8	225.3	5	4	5
31.25	246.5	2055.5	2708.2	1419.3	19.6	3	2	1
23.38	516.2	2005.7	1947.7	326.2	301.1	4	2	1
31.25	475.7	2059.3	2450.4	742.5	184.3	1	3	2
29.09	573.7	2090.1	1593.9	563.4	189.7	3	2	1
33.98	298.5	1885.9	2636.3	1050.9	202.2	5	2	2
24.78	1156.3	2634.7	2956.2	1411.2	61.5	4	3	4
35.55	769.3	1283.7	623.7	637.7	71.2	2	1	3
43.66	518.6	1621.4	2985.3	-121.4	114.8	3	1	1
30.53	611	1938.4	1978.6	715.9	213.7	2	1	3
34.61	661.7	1265.3	3025.7	1277.1	75.6	3	1	3
36.92	816.6	1906.6	1603.7	1118	41.9	4	1	1
28.19	730.8	2709.7	1423.9	1071.7	349.2	4	4	4
33.19	1138.6	1992.6	3267.8	771.9	7.9	2	2	4
31.5	711.9	2084.3	984	349	289	5	1	4
32.18	1212.1	1432.7	3024.1	1108.5	283.7	3	2	4
25.22	1069.9	1714.1	1785	537.2	107	3	4	1
31.6	420.6	1819.5	1888.5	1814.9	48.8	3	3	5
35.38	1149.9	1844.6	1181.1	1131.9	52.4	3	2	5
43.01	327.5	2543.7	2091.3	644.6	251.1	3	4	5
39.07	1035.6	2227.3	1238.7	631.6	231.4	3	2	1
48.63	594.4	1497.7	255.1	851.1	281.8	3	2	5
25.26	1096.8	2091.2	1055.7	789	337.5	2	2	5
38.38	1086.7	2201.3	141.9	1363.2	249.1	4	2	5
32.87	1024	2481.9	3485.5	969.3	56.1	3	2	1
48.92	1007.9	2674.4	3442.2	580.7	87.6	1	3	4
24.93	517.7	1539.8	1479.3	1690.6	303.2	4	2	5
24.68	291.7	1629.1	2625.6	911.3	75.4	5	3	4
26.6	617	1433.8	1309.6	1215.8	26.1	5	1	3
14.41	385.3	1881.2	2428.6	632.9	253.2	3	1	5
27.19	911.9	2187.3	2890.7	1044.1	144.9	1	2	3
25.33	559.6	2415.1	3376.8	1022.1	331.2	3	4	3
32.6	1195.4	1950.3	1496.7	90.5	234.1	1	2	3
34.13	857.4	1843.7	2814.5	1743.5	32.6	5	3	5
46.41	1040.7	2049.8	1034.8	1436.7	341.2	2	2	1
39	343.8	1618.5	3526.7	722.3	93.1	2	1	3
26.78	1080.6	2896.8	208.6	423.8	121.4	3	1	4
24.21	1142	1280.8	2196.1	1037.5	144.8	3	2	4
35.34	701.9	2064.3	2388.7	927.1	18.4	4	1	3
20.84	822.3	2868	2486.9	1041	178.7	3	1	5
46.05	982.5	1986.5	534.1	971.5	44.4	2	3	5
40.84	386.6	1900.4	3348.5	1104.7	144.3	2	1	1
27.65	717.6	1827.3	743.3	1503	126.3	3	3	3
17.69	612.6	1904.7	2262.3	1130.9	278.2	1	2	1
42.23	357.8	2583.6	886	446.1	289.1	3	3	2
30.48	581.2	1016.7	1176.8	1467.2	55.2	3	3	3
41.3	278.9	2653.8	1999.8	1584.9	132	4	2	5
18.64	236.1	1361.1	1555.1	2224.7	134.4	5	2	5
26.6	346.5	1866.9	671.2	414.8	54.5	5	3	1
31.44	1182.7	1795.9	708	993.2	287.4	5	4	1
31.78	765	2240.8	1558.4	9	254.6	2	1	3
27.8	1185.5	1285	2725.1	1124.5	68.5	1	1	3
36.38	646.8	2185.5	3209	658.3	132	2	4	2
22.86	524.9	2868.3	409.4	1704.6	38.1	5	2	5
30.26	721.2	1387.7	1472.3	562.5	226.2	5	3	5
32.36	653.9	2066.4	464.8	175.4	43.7	5	2	3
35.52	316.7	1694.1	177.1	690.9	354.9	1	1	5
37.09	857.2	2169.7	2396.3	54.2	281	5	3	2
22.4	428.2	1991.9	2192.4	1208.3	140.5	3	3	4
19.13	835.8	1703.1	680.8	16.3	208.3	1	2	3
41.62	866.7	2196.7	924.3	902.4	328.1	3	2	1
34.06	363.5	2772.2	201.6	10.9	199.5	1	3	5
25.41	272	1900.1	2992.2	754.8	62.8	3	3	3
43.81	998.6	2298.1	3472.9	1586	136.3	2	1	4
32.33	674.4	1418.2	586	1043.1	303.5	3	3	2
40.83	268.7	1565.4	916.3	524.9	231.9	3	3	1
31.94	1214.8	2190	3107.3	877.2	234.3	5	3	1
47.89	268.4	2632.2	3307	898	312.1	4	3	3
45.44	912	2138.9	1563.5	1090.5	321.8	3	1	4
29.41	1203.5	1846.7	294.1	311.8	331.1	4	3	2
39.17	451.6	1983.2	255.5	1141.2	34.1	5	3	4
36.56	353.7	1436.9	2094.4	-254.4	195.9	1	1	4
42.35	332.6	2247.7	1471.6	623.8	266.6	3	2	4
23.68	516.3	2369.2	218.6	683.7	272.5	2	2	3
36.89	312.1	1785.9	2126.4	1158.5	218.4	1	3	5
39.87	909.1	1778	158.9	900	60	4	2	3
17.33	272.9	2099.7	2828.6	295.4	287.1	5	3	3
21.93	724.5	1792.6	1174.1	473.5	259.2	2	4	1
15.09	1216.7	1954.6	258.5	974.5	31	4	3	2
29.24	1032.1	2901.3	2143.9	856.9	167	5	4	1
37.14	831.4	1875.5	1488	645.3	62.6	5	4	4
43.42	519.3	1826.9	3469.9	686.9	121.5	2	1	2
31.99	840.1	1700.5	1992	1185.1	6.5	5	3	2
44.43	742.3	2308.8	1066.8	671.3	144.1	2	2	4
20.36	640.3	1904.3	2560.5	853.1	198	3	4	2
17.77	342	1699.7	1053.9	1808.9	223	1	2	2
30.96	1105.5	2561	3230.6	287.8	238.9	1	4	1
34.47	664.3	2604	1409	106.5	301.1	4	3	4
31.14	406.6	1721.1	2011.5	1222.1	77.6	3	3	1
14.86	581.4	1167.6	294	603.1	43.4	2	1	3
30.69	628.3	2423.9	1585.9	755.7	306.6	2	1	3
20.96	1045.8	1684.2	2983.3	559.7	56.4	4	3	4
36.76	951	2329.1	2891.4	780.4	350.9	1	1	4
34.33	987	1122.4	891.7	1567.1	303.3	4	4	5
23.88	221.1	2373.7	897.7	1229.9	180.3	1	1	1
27.29	630.3	1454.1	2931.5	1255.4	353.3	2	3	2
22.93	696.2	2302.9	3320.6	290.9	35.1	3	2	2
30.9	229.4	1989.7	448	403.1	109.1	3	3	1
39.04	472.4	1566.5	1668.2	-311.4	229.8	3	3	2
23.51	977.9	1805.6	1280.8	547.8	126	2	2	2
35.43	348.5	2283.5	3115.2	1295.4	334.2	5	1	3
27.16	750.7	2029.8	407.3	1109.2	23.6	3	1	4
25.06	427.4	2238.9	846.3	796.6	197.8	1	3	2
30.54	222.2	2847.4	2708.5	881	212.7	3	3	4
23.12	453.6	1299.8	296.5	598.8	235	5	3	2
26.97	1195.6	2690.4	1814.3	977.1	92	2	3	2
21.82	1019.6	2029.1	1640.8	1214.6	131.2	1	2	3
47.12	1179.2	1590.6	1270.3	206.4	303.7	4	2	1
31.68	702.7	1402	1477.3	1017.2	70.2	3	1	1
25.8	320.8	1900.8	1943	1285.1	297.7	3	2	3
33.11	763.4	2386.4	675.1	714.7	202.6	1	4	5
30.5	668.9	1927.7	2087.7	1187	274.4	1	4	4
29.63	1062.8	2644	2890.7	2081.8	256.9	3	2	1
36.31	309.1	1349.2	2735	846.2	74.7	2	3	5
37.46	703.1	1978.2	649.4	1056.9	204.8	3	4	4
27.16	361.5	1436.1	633.4	578	312.4	3	2	4
26.79	537.9	2142.4	1042.5	967.1	155.6	2	1	5
29.2	954.7	2371.2	1362.1	1085.2	348	5	1	3
12.98	690.8	1799.6	1525.1	972.9	162.8	4	3	2
19.28	589.6	845.2	2458.2	458.8	51.4	4	4	3
42.33	608.4	2070.5	315	977.8	140.2	1	3	3
44.56	674	2174.4	239.3	1509.3	342.6	1	1	3
29.41	1002.9	2160.2	1468.2	1080.3	115.1	3	1	3
36.01	1111	2523.7	2518.2	1297.6	312.5	2	3	5
33.89	1174.9	1515.3	785.4	790.1	317.3	5	4	5
53.8	1004.8	2280.8	2326.8	1207.8	126.1	2	3	5
40.36	528.6	2504.7	1013.8	1008.6	30	3	3	5
30.38	905	1206.1	3168.1	487.9	260.8	3	1	5
23.76	652	2123.2	3201.2	1025.2	112.1	3	4	1
18.55	467.2	1763.1	1142.7	470.6	281.9	1	3	2
33.03	1059.3	1947.9	911.2	622.5	159.4	3	2	3
25.35	248.8	2135.5	1534.9	970.5	174.7	2	3	5
20.02	1120.8	1770.5	947.4	1016.2	280	5	2	3
26.23	676.1	1688.1	2433	387	137.7	1	1	4
22.75	853.6	1998.4	2961.7	1336.6	159.5	5	2	1
44.9	875.9	1508.3	2435.4	1132.5	135.4	4	1	2
38.45	1114.1	1508.9	2955.8	592.1	132.2	2	2	4
31.34	853	2280.5	1485.7	239.5	189.3	4	2	1
43.24	830.1	1481.4	657.7	829.1	291.2	1	3	2
32.02	277.3	2274.7	2658.6	701.6	130.2	5	2	2
24.51	733.6	2185.7	1360	938.3	188.7	3	2	2
43.58	361.7	1229.1	2429.2	736.7	241.5	2	1	4
35.71	954.8	1687.3	1051	40.6	97	3	3	2
23.1	727.3	2505.4	399.4	726	99.9	1	2	3
29.88	897	1554.6	3534.5	761	336	5	2	1
24.4	252.1	1780.5	657.3	1158.6	260.5	1	4	5
20.34	295.6	2185.5	3520.2	594.9	207.8	4	3	2
38.81	933.5	2325.9	3481.8	1601	233.2	3	4	4
46.68	282.8	1873.6	2850.7	81.2	10.5	5	2	4
20.21	282	1722.3	2388.4	1445.4	222.5	2	1	2
35.9	222.2	2605.2	2107.7	795.4	183.4	3	3	5
26.19	1176.1	2743.6	3099.4	1254.3	196.5	3	2	4
27.5	954.9	2411.4	1115.7	924.2	129.4	4	2	3
26.66	566.8	2020.8	1728.8	1372.8	29.3	1	1	1
24.49	509.5	1630.2	2250.7	726.4	69.6	2	4	5
31.79	563.2	1620.5	1534.5	425.4	342.3	2	1	4
24.75	992.4	2211.9	1590.6	1491.7	147.1	4	4	2
33.56	878	2166.4	1256.2	842.4	168	2	4	2
31	397	2596.1	2061	984.2	19	3	2	5
29.49	385.9	2267.8	3046	1413.1	13.5	2	3	4
24.14	309.4	1326.5	813.3	453.6	258.2	5	3	4
26.79	876.9	2443.3	3334.4	1142.5	193.7	5	4	3
37.44	982	1547.2	2490.5	640.7	183.1	3	2	4
35.41	477.7	1815.7	2952.1	834.5	87.5	3	3	2
23.58	231.2	2092.9	2033.3	921	268.1	2	2	2
32.19	293	2855.8	2801.5	255.4	60.6	1	4	4
37.41	1187.5	3342.8	175.7	560.7	68.4	2	2	5
18.04	508.4	2248.7	2935.2	1462.3	165.9	4	2	2
35.75	986.9	1903.4	258.1	1265.5	103.1	3	3	3
26.1	840.9	2217.1	3181.3	863.9	89.1	5	4	4
35.96	595.8	2371.5	3532.4	993.3	232.3	3	3	3
25.29	417.7	1843.3	1131.6	765.8	234.3	4	1	5
16.96	332.6	2768.2	843.5	1464.6	296.8	3	2	4
18.38	831.2	2084.1	2752.8	805.6	150.4	3	4	1
31.78	992.4	2201.1	990.4	988.5	26.3	2	3	5
33.48	860.3	2274.6	3097.5	1375.5	98.5	3	4	4
24.17	745.6	2167.8	473.8	561.3	352.8	3	1	5
36.51	252.4	2350.2	553.3	1550.2	214.7	4	2	4
18.11	1188.2	1713.7	3488.3	242.6	255.5	5	3	5
30.87	1016.7	1739.5	2438	1580.2	2.6	2	4	1
21.71	505.8	1502.6	3033.3	732.6	186.6	1	1	2
26.19	1199.8	2175.6	1235.7	787.7	13.5	3	4	5
31.78	817.9	2324	2447.1	90.4	204.9	3	3	2
24.52	798.2	2183.6	2164.2	697.9	331.5	2	1	1
28.32	965.6	2715.4	2194.8	450.2	348.6	4	2	4
39.45	1029.9	1981.1	2467.9	633.2	194.6	5	2	5
26.78	873	2275.8	2099.2	832.3	165	5	3	1
38.09	339.4	1506.3	1596	1295.8	340.2	2	1	5
22.36	551.7	1814.3	1069.2	978.3	242.5	5	1	4
35.64	1147.4	2287.5	2763.9	1020.6	23.4	4	4	3
42.93	436.9	2354.6	898.4	426.7	167.7	3	1	5
11.63	585.9	1855	2501.7	517.6	86.5	3	2	3
25.02	646.4	1952.2	922.7	1651.8	169.1	4	2	1
36.02	653.8	1320	2271.1	579.2	164	3	3	2
29.78	829.1	1827.4	2689.9	1591.5	209.6	3	3	3
34.37	1162.5	2372.7	872.4	787.5	128.4	3	2	3
26.57	453.1	2234.9	326.2	891.4	59.1	3	3	5
32.09	332.7	2202.3	570.5	1343.5	181.3	2	3	4
30.15	409.4	2005.3	2204.6	1428.8	298.9	5	1	3
40.74	1105.8	1986.6	3042.1	843.5	239	4	1	4
33.44	862.3	1694.9	274.8	726.1	121.8	3	2	1
34.1	498.8	2289	2645.5	866.7	336.8	1	2	1
28.1	1034.1	2167.5	1294.1	1033.5	328.4	3	3	5
27.5	1080	2198.6	1766.1	1267.7	75.4	1	3	1
27.94	1065	1753.6	3315.3	892.2	14.2	1	2	2
34.56	1138.1	1042.3	1262	1152.4	266.9	3	1	4
28.03	464.8	2463.1	1720.8	1583.9	297.9	3	2	3
33.72	972.6	1774.2	167.1	1051.8	348.4	3	3	5
48	675.1	1606.4	400.7	1022.3	320.3	1	2	2
38.37	1060.4	2286.6	1009.6	247.4	216.2	3	3	1
28.79	945.8	1812.2	215.8	-223.2	190.8	2	1	2
41.01	994.2	2446.8	2291.9	1054.8	10	5	3	3
28.14	872.7	2253.2	1586.8	850.3	88.8	3	4	2
15.1	389.2	2282.3	2005.6	672.5	165.5	4	2	3
23.34	760.5	1386.4	720.8	993.5	226.3	2	2	5
16.43	1204.5	2513.2	1138	864.8	200.6	1	4	5
28.59	1156.8	2097.7	2403.6	1367.8	267.3	5	2	2
31.55	253.6	1822.1	3440.6	926.9	100.7	2	3	3
44.81	376.5	2046.2	293.4	574.2	203.4	3	1	3
34.02	343	1207.1	3182.9	1309.5	31.7	3	3	5
29.65	943.2	2162.1	2104.5	798.5	148.9	1	1	5
38.04	1036	1533.6	2059.9	1113.3	270.1	4	4	2
13.71	425.6	1392.2	1841	688.3	249.6	3	3	4
33.28	720.9	1318.1	358.7	615.3	356.6	2	3	2
37.57	1059.1	2469.9	429.2	926	100	1	3	1
19.57	950.1	1708.4	2187.1	895.8	179.3	2	3	1
40.55	757.7	2653.9	1292.9	1093.5	118.6	5	2	3
34.11	806.3	1749.3	3275.4	776.7	158.6	4	4	3
28.08	723.4	1237.2	1518.7	113.1	308.5	2	4	1
36.46	510.5	1495.5	612.9	707.2	246.3	1	2	4
49.57	780.7	2523.7	2578.6	1226.4	317.7	4	4	2
32.85	905.8	1915.4	1129.1	764.5	73.3	3	3	3
33.39	1092.1	1743.8	1927.6	786.1	314.4	3	3	2
27.73	852.7	2053.4	2520.5	1307.9	21.5	3	2	1
24.6	978.7	2202.8	3216.9	589	319.9	2	2	3
38.04	371.7	2471.9	2845.1	237.3	118.5	4	1	2
24.55	676.2	2616.6	2446.7	822.4	113.3	5	2	3
31.97	219.4	1826.2	2457.9	685.4	184.4	2	3	1
27.58	459.1	1403.9	3374	481.4	338.6	3	2	3
35.23	943.7	1802.8	1137.6	816.2	17.2	3	2	1
34.07	1211.7	2097.3	123.8	1098.5	126.8	3	4	4
39.7	310.2	1562.2	1055.5	886.5	308.4	2	2	4
27.32	615.5	1565.1	869.5	1020.3	142.6	4	2	1
29.24	1018.1	2133.8	2396.7	1658	71.7	3	1	3
23.57	416.1	1962.2	2300	745.3	152.9	3	1	1
27.85	770.6	1997.8	2161.5	1008.2	138.8	2	3	3
34.42	950.4	1652	175.9	674.8	329.5	2	3	2
37.46	832.1	1882.8	2627	532.1	274.3	1	3	3
24.02	399.9	1579.5	1232.9	642.8	181.8	4	1	3
38.36	568.9	2372.6	2407.8	687.7	355.8	2	3	5
42.25	1001.6	2436	2034.6	1042.6	167.5	4	2	3
34.71	769.8	1176.5	1299	1884.8	21	3	2	3
46.41	215.3	1577.2	582.9	587.3	94.4	3	1	3
25.21	978.6	1329.4	444.8	714	157	3	1	5
21.44	245.7	1699.4	2980.4	863.7	56.5	3	2	4
17.17	963.2	1947	3279.3	1057.9	341.1	1	1	2
43.37	414.5	1349.9	2355.3	1002	276.1	2	4	5
36.63	1177.7	1580.6	475.8	1434	96.6	4	2	3
30.96	581.6	1544.7	1503	-136.7	212.7	4	1	5
33.64	540.2	2074.1	2627.6	-120	259.7	2	1	5
22.4	360.4	2013.8	2802.6	680.5	338.9	3	3	1
50.97	518.7	1668	526.7	1354.9	317.4	2	1	4
32.43	1095.4	2060.8	120.1	227.7	185.5	2	4	2
32.28	1216.3	1744.5	2569.8	-382.7	278.9	1	4	2
37.21	582	1864.8	1346.7	1132.2	202.4	5	2	2
35.25	663.1	2715	995.4	993.5	199	2	2	4
33.19	939.3	2569.4	164.4	428.9	41.3	2	1	2
25.08	1105.1	1415.5	1978.6	473.2	45.4	2	3	1
35.17	809	2346.2	3048	479.9	190.6	1	2	4
46.46	605.4	2338.2	3414.3	937.2	96.8	3	2	1
42.16	626.7	1481.6	2066.2	625.3	7.6	1	2	1
44.15	912.6	2341.4	1889.7	1099.5	260.2	1	3	2
27.31	213.3	2655.7	412.6	-318	11.7	3	2	2
23.48	835.8	1492.8	2008.1	527.7	214.3	2	1	3
30.39	569	1582.5	1427.1	413.7	194.1	4	3	1
31.85	1012.1	2428.3	2208.5	781.9	348.8	3	3	5
40.15	303.9	2102.2	1457.2	662.6	174.3	2	4	4
17.86	804.1	2224.6	946.6	1228.1	22.9	4	1	2
43.64	695.8	2132.4	446.7	103.3	198.6	1	3	2
30.14	858.7	2154.3	1203.3	909.7	302.8	3	3	3
27.98	275.5	1403.7	452.5	1126.7	358.9	3	1	4
23.3	795.8	2441.3	728.5	1676.3	154.9	2	3	1
18.16	777.1	2494.7	3516.4	686.5	115.3	3	2	1
37.99	776.3	1883.2	1647.7	1027.7	326.4	5	4	5
31.99	819.5	1964.5	1949.6	126.8	68.8	5	1	2
21.08	893.2	1314.3	3125.2	-122.1	221.6	3	3	2
21.04	1023	2208.3	3544.8	1248	146.1	3	2	5
28.71	482.5	2233.5	2124.5	888	14.8	2	4	4
44.75	1043.3	1956.3	2914.9	1389.3	125	2	2	2
29.32	713.2	2475	1244.7	309	95.5	3	4	4
19.37	287.8	1837.5	1171.8	1110.5	247	3	4	1
29.43	269.1	2230.3	1505.3	1681.5	341.6	5	2	4
29.22	547.6	1537.8	2433.4	1068.1	96.5	3	4	3
9.82	1002.7	1973.2	2466.7	1007.5	292.1	3	4	5
30.97	924.8	1907.3	1204.4	894	19.9	3	2	5
29.55	1006.5	2082	578.2	225.4	193.7	4	2	5
36.97	732.4	1822	2295.4	1464.2	25.4	4	3	5
46.19	654.6	1926	561.4	631.8	336.3	3	2	3
40.41	358.9	2344.6	2110	1103.9	275.9	2	1	2
29.25	541.5	1792.6	2505.4	228.8	236.9	4	2	3
22.55	648.4	1281.3	2530.1	391.1	296.6	1	2	4
51.99	299.5	2748.2	2711.9	1497.9	233.1	5	2	5
31.87	432.8	2587.3	3122.6	743.4	348.8	3	1	2
31.51	814.2	1418.7	1839.9	1505.6	257	3	4	5
31.21	953	2285	2632.1	857.3	332.9	3	3	5
32.98	1218.3	1763.6	2250	110.7	186.2	4	1	5
30.25	1152.4	2098.7	762	1268	42.1	1	3	5
26.81	859	2112.1	208.4	640.7	190.1	5	3	2
27.03	635.5	1881	1098.8	1186.2	45.7	3	4	1
31.14	852.5	1640.9	1644	901.1	213.3	2	1	1
27.05	1003.5	1681.7	2242.8	237.2	173.7	1	2	2
25.7	329.5	1583	3043.9	959.9	224.1	3	4	4
32.25	624	1619.9	795.1	1820.1	3.6	3	4	5
29.36	1058.2	1954.1	551.9	1099.1	70.1	3	3	5
43.43	597.7	1670.6	3434.4	866.1	176.9	4	3	4
10.19	787.6	2281.6	491.7	1345.6	342.2	3	1	1
40.13	803.6	2633.6	1766	979.6	138.1	5	3	1
41.37	396.3	1730	2134.3	979.1	152.8	3	2	1
14.81	575.9	2088.1	1982.3	428.3	257.3	4	1	2
28.66	547.9	2201.9	416	989.4	217.4	1	4	3
28.43	236.5	2189.8	316.2	1328.7	107.6	3	1	1
20.14	234.4	2016.7	482.9	536.5	147.9	2	2	2
25.18	1050	2308.1	2134.4	1493.4	78.4	3	4	1
22.52	485.8	2194.3	1992.5	851.6	347.8	5	1	4
45.42	733.3	1442.5	924.1	514.6	47	1	4	3
38.89	511.7	2363.4	2313.9	1312.7	133.9	1	4	3
41.57	1160.1	2371.3	2941	769	9.3	5	3	3
37.17	471.9	1649.9	263	1211.9	79.8	2	1	5
22.37	644	2000.1	1833.6	766.9	281	4	2	2
27.2	1091.5	2282.2	2491.2	865.1	72.4	3	2	3
35.31	1060.4	1892	988	1099.3	28.8	4	2	4
21.62	398	2452.5	1178.7	1013.5	170.8	1	2	3
37.1	1020.7	3016.7	2230.9	45.7	3.6	1	4	5
29.48	672.8	1639.9	3208.9	415.8	30.5	3	1	2
28.4	697.8	1379.8	2906.1	1283.8	290.7	5	3	3
37.09	344.8	2116.3	2126	834.5	277.7	3	1	1
34.95	291.4	2298.9	2632	668.7	329.4	2	3	4
28.51	945.2	1882.6	1375	315.3	307.6	3	4	2
40.67	711.4	2618.7	2324.9	433.3	245.9	5	2	1
22.75	651.2	1398.4	1723.7	34.6	18.8	4	1	3
36.33	946.8	2286.4	773.4	847.5	281.8	5	3	3
36.14	983.2	1718.7	2534	637.1	304.4	1	3	1
28.92	370.5	2735	2034.2	481.2	287.7	1	3	4
34.01	826.3	2854.4	1353.7	861.6	183.1	3	2	4
21.39	346.7	1648.4	3255	1044.5	83.8	4	2	1
38.79	968.9	1743.3	192	1776.5	304.3	2	4	3
29.92	873.5	2359.2	1206.3	250.4	261.8	2	4	4
27.22	1176.2	1814.3	315.7	1381.2	353.1	4	2	3
39.79	279.6	1963.7	2756.9	1302.3	56	1	4	2
25.77	267.6	1994.6	2535.2	560.6	81.2	3	2	2
20.13	495	1144.4	1259.9	976.4	76.2	3	2	4
18.95	474.3	1977.5	2444.3	696.7	285.3	3	1	5
36.25	459.4	1682	1482	969	67.3	4	2	4
21.16	1125.3	1768	2721.5	1529.2	24	3	3	1
45.44	462	2614.5	1682.4	1146.8	359.5	3	1	3
14.74	484.7	1434.3	1538.2	1105.7	8.9	3	2	5
44.97	977	2339	3335.5	708.3	300.7	3	3	1
33.09	664.2	1861.6	983	262.2	131.5	3	3	5
30.63	994.5	1861.2	534.3	802.2	303	2	3	5
27.04	276	2329	2130.8	1401.2	199.7	1	4	1
34.59	702.4	2132.1	3454.5	243.9	324.6	1	1	5
31.1	243.9	2232.9	1419.8	443.8	333.4	2	3	2
40.23	273.3	2406.7	333.4	943.8	3.3	3	3	5
32.31	1125.5	1838.7	1287.2	473.6	27.1	4	3	3
32.6	350.6	1715.9	1860.4	554.9	90.1	4	2	3
28.49	747.7	1509.2	677	711.1	241	4	1	4
30.94	625.2	1622.7	2383.9	312.3	319.8	3	4	4
33.86	560.8	3272.5	3552.3	478.1	165.6	3	2	1
17.72	1118.8	2527.5	1674	1188.2	218.5	3	4	3
20.61	232	1392.9	1340.3	337	67.9	2	3	1
37.35	880.4	1405.5	1498.4	214	289.8	1	3	2
32.77	1183	2194.1	516.1	623.7	348.2	3	4	2
29.93	775.8	2222.7	3158.5	1200.2	96.7	5	3	3
31.55	1156.2	2223.4	1547	807	178.1	2	2	2
34.18	262.8	1872.1	1452.2	693.7	31	1	3	1
27.08	633	1928.7	2389.3	909.2	201.3	4	4	1
25.17	472.8	2126.8	1640.6	151.4	181	2	2	1
32.97	948.1	2021	2349.9	1099.8	52	4	2	3
23.57	1201.1	1013.4	331.4	1052.7	159.1	4	1	5
34.67	469.1	1883.1	2919.2	717.1	120.3	5	4	1
17.78	870.7	1611.4	3355.3	1316.2	187.9	3	1	5
39.63	410.1	2060.1	2351.8	413.1	210.8	4	3	4
35.18	781	3288.4	3403.7	1367.8	3.1	3	2	4
33.45	678.6	2144.1	640.9	955.8	274	3	2	4
39.26	1191.7	1846.5	1762.3	747.9	256.7	3	3	5
44.72	824.6	2386.4	2190.2	882	131.9	2	1	1
39.51	563	2194.5	2121.2	845	19.1	3	3	3
16.67	325.2	2167.1	1501	1406.9	271.8	3	3	4
21.16	362.8	2248.8	1283	434.6	343.9	4	4	3
26.4	437.6	2882.4	556.3	567.6	86.5	4	1	5
31.61	463.5	1489.2	1467.6	1329.1	116.5	4	4	1
35.54	1069.1	2190.5	679.6	638.3	66.2	1	3	4
25.59	776.8	1578.6	2646.2	1271.6	207.7	4	4	3
32.89	738.6	2226.3	838.4	1609.8	55.7	3	2	2
25.36	325.9	1581.9	321.5	720.3	128.2	5	3	2
26.51	1078.7	1801.1	2020.1	1178.8	250.9	5	4	4
20.15	940	1854.5	2167.6	402	201.6	1	4	5
24.01	278.3	2410	3119.4	1209.9	139.1	4	2	3
20.59	924.9	2385	2104.8	974.8	151.3	1	2	5
23.59	759	1439	1308.5	1090.6	202.4	3	2	3
39.83	292.5	2007.5	2882.4	617.1	2.1	3	2	1
23.8	672.9	1673.3	1978.6	187.3	28.3	1	2	1
52.46	699.5	1433.4	392.7	1103.4	317.3	4	2	1
35.35	377.4	1888.6	2066.5	17	28	1	4	2
32.88	1165.2	1848.7	3243.6	756.1	254.4	2	1	2
24.53	1068.5	3044.2	1483.3	1288.8	331.2	3	3	4
37	885.7	2172.7	1139.4	971.6	97.4	4	1	4
26.79	676.9	1381.3	613.5	1715.1	133.4	5	2	1
32.38	625.9	1736.6	641	1324.3	204.8	4	1	2
51.88	867.5	2429.9	1608.7	613.6	317.4	4	2	2
30.63	760.9	2896.4	2169.1	902	339.1	3	3	3
40.59	272.9	1290.3	397.3	870.3	266.2	1	4	1
25.77	727.6	1161.8	3352.1	220.7	31.2	1	2	1
31.12	1024.5	2801.3	2717.7	492.3	240.9	3	2	5
45.57	673.8	2153.8	2138	653	147.7	4	2	5
26.38	262.5	1604	2969.8	28.5	169.5	3	4	1
45.9	1004.1	2217.2	395.8	910.5	17.7	4	3	3
37.06	413.4	831.4	1760.3	785	68.8	3	3	2
26.9	471.2	1985	2287.5	182.3	284.6	1	3	4
36.46	376.4	2126.8	2970.6	1061.5	163.4	2	4	3
39.18	543.5	2387.5	2815.1	1193.4	108.6	4	1	1
36.37	974.3	1540.3	1073.1	986.5	138.2	4	2	4
18.84	734.6	2021	3356.6	753.2	307.6	5	4	2
25.58	416.9	1579	547.7	1140.8	269.6	1	3	2
29.42	1096.6	2095.1	3130.5	1178.3	98	5	3	2
30.8	1098.4	1592.1	3460	1020.5	42.3	2	3	3
36.37	1089.3	1805.1	729.4	541.3	90.7	1	2	2
32.82	451.2	1548.2	2603.9	1007.5	331.5	5	3	2
20.72	665.8	2268.1	258.6	1396.4	209.4	2	3	2
34.44	1204.8	2358.7	1514.7	637.8	192.1	4	2	1
36.28	989.7	1880.9	1896	1778.5	214.7	2	3	4
35.88	237.4	2000.2	2117.4	667.9	131.8	3	4	1
40.05	275.9	1350.3	3339.6	904.1	290.6	5	1	1
38.07	678.6	1852.5	2432.5	605.7	188.4	2	2	4
35.07	1128.3	1961.6	1775.6	984.9	42	4	2	4
30.84	754.1	3129	2905.3	152.9	46.5	2	3	5
18.11	712.8	1497.5	3389.8	659.3	193.3	3	2	3
34.84	316.5	2623.5	195.9	428.1	337.2	2	3	2
33.06	873.3	2419.2	3499.9	947.7	111	2	4	4
33.57	1040.3	2106.2	416.3	1311.3	313	2	2	4
21.19	594.2	2752.2	2921.5	1163.9	275.1	2	4	2
22.75	993.4	2146.1	1084.4	-113.5	89.2	5	4	5
39.83	1184.1	2153.6	574.7	1754.8	13.1	3	1	1
31.08	415.8	1960.3	1633.1	1015.4	36.7	2	2	5
36.85	738.6	2518.3	2335.2	561.7	262.3	3	4	5
31.63	500	2462.8	1430.5	956.9	71.9	2	4	4
31.64	1010.8	1710	307.7	965	133.7	4	1	5
38.91	793.4	1406.9	2182.1	608.1	180.6	5	1	4
27.27	850.9	1894.8	3224.3	974.2	261.2	3	1	1
32.17	1015.9	1633.8	1438.3	633.3	40.8	5	4	3
27.7	609.9	1955.7	864.2	719.2	146.3	3	1	1
27.92	1134.2	2524.4	1642.5	599.9	174.6	2	3	2
28.93	748.4	1783.6	286.4	284	194.7	4	4	4
33.18	369.5	1964.8	2942.5	952.1	294.6	3	1	2
27.57	912.9	2008.9	2962.6	1138.2	61.8	4	3	2
41.45	1011.2	2354.3	2142.7	1108.4	290.8	5	2	3
24.24	529.9	1001.4	1334.7	1237.5	249.4	3	4	5
29.91	1075.8	1718.3	2871.3	1027.7	200.1	5	2	1
27.88	1125.2	2075.9	2028.1	664.9	251.8	4	3	2
42.98	489.7	2508.1	2961.2	1245.8	148.3	3	3	1
32.97	1203.4	1768.5	2292.2	315.8	49.8	3	2	4
39.65	352.1	1163.3	2818.4	509.1	239.7	2	1	1
19.52	414	2254.4	2179.1	482.3	188.9	5	2	4
33.54	396.1	1705.8	1544.6	1347.6	230.2	4	2	2
38.52	1112.9	1463.5	3415.3	1289.5	121.7	1	4	1
32.06	870.8	1710.6	1981.4	1096.7	326.5	2	4	5
39.92	363.6	1902.8	2201.5	1344.1	211.5	3	2	1
27.26	654.7	1719.2	878.5	518.2	30.7	1	3	3
42.67	831.5	1019.4	2272.2	1038	161.9	1	3	1
49.79	294.3	2375.6	2086.3	837.4	272.3	3	4	3
28.5	1101.2	2540.7	755.8	1248.9	285.9	2	2	3
27.84	1021.6	2268.3	325	841.6	178.1	3	2	2
43.03	720.3	1486.2	2199	727.5	322.1	2	2	1
44.04	1186.8	1895.4	2747.1	1119.4	96.4	2	3	2
27.22	631.9	1980.6	1920.5	1261.3	147.8	4	2	4
28.04	1204	2245.2	900.1	607.5	323.5	3	2	4
29.15	884.6	2275.6	2412.8	864.5	322.7	2	1	3
20.64	851	1662.6	395.6	442.4	246.9	2	3	3
24.05	377.6	2019.3	1639.9	-167	309.2	3	2	2
23.37	1100.7	2183.4	682	975.3	32	1	1	2
25.26	641.8	2619.8	754.5	1148.1	311.4	1	2	1
31.12	373.9	2291.4	815.9	1001.3	115.4	1	2	2
33.27	222.7	2328.4	1450.3	65.2	64.2	4	3	2
43.8	775.4	2020.1	296	741.9	86.2	4	2	3
23.41	742.7	2600	1488.4	-48.6	150.5	4	2	3
39.27	936.5	2162.6	1880.3	1470.2	90.4	4	3	5
29.69	1109.2	1607.1	1782.5	430.7	115.4	4	2	1
31	290.2	2596.9	1436.8	1421.8	48.6	3	1	4
36.8	948.8	2288.6	3006.7	1290.8	106.6	3	4	5
22.42	399.3	1789.8	619.9	509.2	206	1	2	3
34.46	1076.8	1773.9	1859.6	410.9	159.1	3	2	2
32.73	1037.3	2113.1	333.4	1038.7	124.8	4	1	2
35.34	756.2	2186	364.8	533	268.7	3	2	1
33.71	927.3	2069.7	2094.1	933.8	321.7	3	3	2
51.04	527.5	2119.6	2067.1	686	272.4	2	3	4
26.3	685.9	2726.6	3140.4	136.4	119.5	3	3	1
27.15	1039.9	2451.9	2039.1	-53.8	268	4	1	2
26.41	673.9	2066.8	3421.7	986.4	54.7	5	2	4
26.96	571.4	2394.9	287.5	652.7	46.9	2	4	4
26.3	709.2	1532.2	457.1	656.3	124.4	4	4	3
40.91	1046.5	2157.4	271.6	1185	290.8	3	1	4
42.76	548.6	2774.3	757.4	1387.1	88.7	5	2	2
26.83	385.5	1888.2	1982	775	22.8	3	2	1
24.74	929.1	1613	2340.8	746.2	47.4	3	1	2
35.17	1044.2	1698.5	276.8	1102.1	309.1	3	2	3
26.98	311.6	1507.2	3374.1	316	228.2	4	1	5
36.46	452.3	1640.5	3017	984.9	91.2	5	3	1
33.02	353.4	1821.6	1140.3	1124	199.9	1	3	3
19.27	561.4	1369.1	385.5	1178.3	189.9	1	1	2
43.78	664.9	1990.3	704.4	70.6	236	5	1	3
45.77	966.3	2377.9	556.7	568.1	83.9	3	4	1
26.5	867.7	1586.7	544.1	518.6	311.2	3	1	2
28.3	837.1	2647.6	1903.9	932.7	111.4	3	3	5
33.69	565.9	2206.8	965.7	1093.9	249.9	1	2	3
34.08	1059.9	2434	1352	1524	5.8	4	3	3
36.67	686	1696	3523.9	680.9	134.2	4	2	2
47.48	1198.9	2357	2474	679.8	126.6	2	1	2
29.98	850.5	1506.2	3384.5	1377.1	195.7	2	2	2
25.01	337.5	2372.6	610.4	1015.9	26.2	4	1	5
20.37	892.9	2058.6	1434.6	1427	284.4	1	2	5
25.55	538.4	2225.3	2028.3	1012.6	78.4	5	3	3
31.13	903.2	1469.6	384	400.6	243.7	2	2	2
45.76	280.3	1592.3	134.4	326.1	289.2	3	1	5
27.26	386.6	2244.5	2426.3	233.6	202.3	5	3	3
33.19	1074.3	1569	2327.9	1170.6	266.7	4	3	3
31.27	439.5	2186	1533.1	1393.5	238.3	3	4	2
40.91	1055.4	1385.9	1804.4	1673.2	128	4	3	4
51.62	492.1	2354.2	1549.1	1247.3	291.2	2	2	3
27.15	859.3	1444.8	202.6	1382.6	106.1	2	3	5
27.48	911.1	2224.9	1273.7	644.9	205.6	5	4	4
39.75	727.8	2257	729.2	400.9	268.3	4	4	2
36.86	518.4	1678.9	458.6	1250.2	136.4	3	2	4
46.17	424.8	2237.9	3411.1	1067.2	109	3	2	5
36.07	243.5	2097.3	2181.8	935.9	165.4	1	2	2
28.53	517	1748	2626.6	1054.4	294.5	1	3	1
36.13	869.7	1542.7	1204.9	1027.2	334.8	3	3	1
40.27	1157.7	1125.6	1472.4	1433.8	196.2	4	3	3
37.96	1089.9	2136.3	935	1438.6	238.1	3	1	2
35.46	983.7	1299.5	453.6	1120.8	325.2	4	3	3
39.93	1006.3	2025.2	735.9	1248.4	35.5	1	4	1
40.75	881.6	1868.3	2863.4	1108	83.5	3	2	5
42.46	472.9	2280.4	2450.8	695.2	255.2	2	3	2
36.59	1126.3	1851.5	2001.4	1210.7	296.5	3	2	2
30.06	887.4	1839.5	1754.3	300.1	308.5	1	4	3
32.57	776	2303.4	3293.2	1336.5	149.4	5	4	3
41.05	322.1	2130	370.2	384.8	32.2	2	3	2
24.86	661.5	2121.7	1085.3	1011.4	157.6	5	3	2
34.35	675	2188.6	1323.8	532.6	83.1	3	4	1
28.25	1083.2	1312.3	2811.5	1124.6	104.8	5	2	4
31.63	762.1	2314.3	3534.3	876	278	3	2	4
41.63	594.2	2251.2	947.9	215.3	27.2	5	3	3
32.93	1196.6	1539.1	3127.6	1068.5	297.9	1	2	4
31.77	321.8	1876.8	2977.3	645.8	154	4	2	4
20.52	636.8	1966.3	892.8	1263.4	214.6	5	4	1
37.37	252.4	1924.7	1493.7	891	32.3	1	3	5
36.56	957.3	2129.4	1529.3	1057.8	121.4	1	2	5
48.71	1137.3	2609.2	3485.1	485.1	32.3	3	2	2
28.94	492.8	2456.3	742.3	640.9	346.2	5	2	1
33.15	1076.9	1409.9	2869.1	696.3	290.6	3	2	1
33.4	505.1	2255.4	1269.6	1253	165.5	3	1	1
44.02	1129.9	2564.4	2634.2	1600.4	80.5	1	3	4
30.64	971.5	2152.6	1564.8	549.6	336	1	2	3
33.63	1023	2460.4	2109.6	1346.2	124.1	4	2	4
36.26	228.2	2863.1	2984.2	-28	58	1	2	4
32.89	1182.4	2431	2886.3	384.9	202.7	3	4	4
27.83	943.9	2092.5	3100.5	484.5	339.8	5	2	4
32.95	517.8	2440.3	325.1	317.9	1.4	2	1	1
39.99	1047.7	2046.8	2500.7	220.1	85.7	4	1	2
23.19	494.3	1993.9	601.6	1065.2	337.8	1	3	4
32.46	1091.5	1829.9	1550.4	799.8	61.6	3	3	1
25.8	323.7	2666.9	2007.1	1051	40.8	2	2	1
40.96	920.7	1625.8	1505.4	1182.7	205.3	4	2	5
19.21	756.1	2653.3	1907.5	1002.8	310.3	2	1	4
26.93	307.5	2202	3548.1	1168.8	171.8	3	3	2
34.42	454.3	1371.9	585.1	861	358	3	3	4
43.92	222.5	2144.2	2443.6	387.9	244.5	2	1	4
30.87	683.5	1065.6	1482.2	1338.2	26.7	4	1	2
26.96	514.3	2256.9	577.6	641	357.4	2	1	1
46.45	814.3	2370.4	666.1	494.4	146.8	4	1	5
19.82	510.2	1724.6	3385.5	815.1	103.5	2	3	2
13.81	512.9	2037.5	3145.8	504	200.8	4	1	1
34.92	960.6	2837.7	3240.2	713.7	109.6	1	2	3
27.38	258.6	1762.4	3530.9	1036	31.1	3	1	4
23.23	1121.9	1520.7	836.6	1037.9	0.5	2	4	2
37.07	1070.8	2631.1	1342.7	510.3	161.9	4	4	2
33.35	884.5	2841.3	2422.1	684	301.3	2	2	2
26.89	809.2	1985.1	1784.3	1345.2	206	5	2	5
21.16	1111.2	2425.6	1559.3	1100.5	359.7	5	2	1
38.38	397.2	2569.9	1350.9	1768.8	103.3	2	2	3
36.6	289.8	1659	2162.6	1389.9	101	3	1	5
30.61	451.9	1771.4	2100	1374.8	57.5	1	3	1
46.17	1012.5	2521.5	675.4	302.9	59.1	3	3	5
22.84	245	2720	1742.8	1213.7	102.7	4	4	5
19.2	798.6	2229.5	2023.9	867.9	285.4	4	1	5
25.86	1215.4	1598.9	2081.8	657.2	326.1	3	4	2
31.04	1074.3	2852	842.8	961.5	351	2	3	4
33.35	736.7	1751.4	2673.4	1290.5	83.6	3	1	4
29.47	274.3	1837	206.7	1102.4	317.3	1	2	5
34.22	1049.7	2133.1	1340.6	518.5	118.2	4	1	1
21.39	815	2662.8	2803.9	1204.7	40.6	3	2	4
42.95	326.1	2356.8	2059.8	620.5	313.2	4	2	2
30.74	304.8	2164.8	1018.4	982.1	229	2	3	1
40.34	1128.7	2186	2510.6	762	59.3	2	2	3
34.14	885.9	2002.5	2071.8	797.8	154.7	2	4	4
35.05	1047.6	2227.5	2859.1	1214.8	103.4	1	1	3
35.96	1097.8	877.8	2648.5	450.1	265.2	2	4	3
34.98	787.5	1853.9	2218.8	1713.8	163.2	4	2	5
36.54	732.6	2089	1799.3	119.5	356.1	5	3	2
42.03	644.7	1480.4	578.1	637.4	19.7	3	2	4
32.97	530.1	2152.4	1019	1047.1	127.8	3	1	2
37.07	648.9	1894.1	1561.7	1137.7	173.5	1	4	2
30.68	991.6	2750.8	2181.6	847.9	181.1	5	2	4
42.92	817.9	2671.1	1887.2	866.1	113.7	1	3	5
25.99	1111.4	1779.9	1111.4	1064.2	262.5	5	3	3
45.81	657.8	1917.6	142.2	792.6	314.9	3	2	4
31.08	823.2	1951.2	1827.1	1480.1	337.9	2	2	1
19.95	847.6	1786.1	1102.6	1245.7	289.8	5	3	2
32.42	807.6	2068.7	2647.1	1259.9	306.2	1	1	3
25.95	919.7	1652.1	202.4	481.4	198.2	3	3	1
38.13	449.8	1489.3	2131.8	856.8	297.3	3	4	2
26.18	727.5	2255.7	3358.7	763.2	109.3	2	1	3
27.83	315.3	2258.7	720	464.7	143.5	3	1	1
16.28	598.4	1631.9	1742.5	1042.9	114.1	4	3	2
27.78	702.5	2374.9	434.5	662.8	168.3	4	2	3
12.01	868.7	1707.4	2272.3	1167.8	102.8	1	2	3
18.73	1170	2094.2	2013.8	437.4	346.2	5	1	5
37.48	816.7	2342.1	1521.3	1618.1	112.6	2	3	4
37.69	961	1968.8	1913.5	511	35.3	2	1	3
34.8	721.3	2182.3	3204.2	983.2	189.7	2	2	5
23.66	850.4	1757.8	795.3	1225.6	20.6	1	3	4
31.02	281.6	1897.6	197.6	648.8	39.8	1	2	2
31.37	466.9	1893.5	3084.1	1251.2	79	5	2	1
22.13	575.5	1657.2	2105.3	370.1	167.2	2	4	4
43.43	687.2	1906.2	3183.9	1505.1	156	1	3	3
38.42	256.1	1306.6	2173.5	896.4	287.9	1	4	4
29.63	351.4	1768.8	2907	637.9	266.2	4	2	4
31.62	489.6	1859	1598.1	763.8	153.5	5	3	4
33.07	1191.2	1871.5	2699.5	1232.8	120.1	2	1	5
15.07	544.7	1877.9	3260.9	643	113.9	1	1	3
29.42	696.9	1956.5	2088.1	573.2	278.6	2	2	1
25.94	408.1	2193.1	741.9	796.6	18.7	1	2	5
23.39	826.9	2365.8	1044.7	392.2	4.6	1	4	2
29.15	493.5	1699.5	803.3	1661	286.4	3	2	4
45.78	419.1	1457.6	969.2	650.6	171.8	2	3	5
36.53	731.7	1528	1174.1	1242.4	47.1	3	3	4
26.83	215.6	1770.5	2029.7	979.1	84.8	2	3	3
35.98	217.7	1829.7	2142.7	473.6	335.7	5	2	3
